# Supplementary material for: Gas-phase organometallic catalysis in MFM-300(Sc) provided by switchable dynamic metal sites
Source: Royal Society of Chemistry journal article supplement (doi:10.1039/d2cc06935k), 2023-01-01
Supplement: d2cc06935k1.pdf [file d2cc06935k1.pdf]

Supporting Information for:

## **Gas-phase Organometallic Catalysis in MFM-300(Sc) Provided by Switchable Dynamic Metal Sites**

Juan L. Obeso,<sup>ab+</sup> Alfredo López-Olvera,<sup>b+</sup> Catalina V. Flores,<sup>a</sup> Ricardo A. Peralta,<sup>c\*</sup> Ilich A. Ibarra<sup>b\*</sup> and Carolina Leyva<sup>a\*</sup>

<sup>a</sup>Instituto Politécnico Nacional, Centro de Investigación en Ciencia Aplicada y Tecnología Avanzada, Legaria 694, Col. Irrigación, Miguel Hidalgo, 11500, CDMX, México.

<sup>b</sup>Laboratorio de Fisicoquímica y Reactividad de Superficies (LaFReS), Instituto de Investigaciones en Materiales, Universidad Nacional Autónoma de México, Circuito Exterior s/n, CU, Coyoacán, 04510, Ciudad de México, México.

<sup>c</sup>Departamento de Química, División de Ciencias Básicas e Ingeniería. Universidad Autónoma Metropolitana Unidad Iztapalapa (UAM-I), 09340, México.

<sup>+</sup> These authors contributed equally to this manuscript.

## **Table of contents**

|                                          |            |
|------------------------------------------|------------|
| <b>S1. Experimental details.....</b>     | <b>S3</b>  |
| <b>S2. Results and Discussions .....</b> | <b>S6</b>  |
| <b>S3. References.....</b>               | <b>S13</b> |

## **S1. Experimental details**

### **Chemicals**

Scandium triflate ( $\text{Sc}(\text{SO}_3\text{CF}_3)_3$ , 99 %), biphenyl-3,3',5,5'-tetracarboxylic acid ( $\text{H}_4\text{BPTC} \geq 99.7\%$ ), tetrahydrofuran anhydrous ( $\text{THF} \geq 99.9\%$ ), N,N-dimethylformamide (DMF, 99.8 %), hydrochloric acid (HCl, 36.5%), and acetone (ACE, HPLC,  $\geq 99.8\%$ ) were supplied by Sigma-Aldrich. Hydrogen gas ( $\text{H}_2$ , 99%) was supplied by Infra. All reagents, gases, and solvents were used as received from commercial suppliers without further purification.

### **Synthesis of MFM-300(Sc)**

MFM-300(Sc) was synthesized following a previously reported procedure.<sup>1</sup> Then, 30 mg (0.061 mmol) of  $\text{Sc}(\text{SO}_3\text{CF}_3)_3$  and 10 mg (0.030 mmol) of  $\text{H}_4\text{BPTC}$  were mixed using 4 mL of THF, 3 mL of DMF, 1 mL of water, and 2 drops of HCl. The resultant slurry mixture was stirred until complete dissolution occurred. The solution was then placed in a pressure tube and heated in an oil bath to 75 °C for 72 h. The tube was cooled down to room temperature. The colourless crystalline product was separated by filtration, washed with 5 mL of DMF (three times), and dried in air.

### **Analytical instruments**

#### **Powder X-Ray Diffraction Patterns (PXRD)**

The PXRD were recorded on a Rigaku Diffractometer, Ultima IV with Cu-K $\alpha$ 1 radiation ( $\lambda = 1.5406 \text{ \AA}$ ) using a nickel filter, the patterns were recorded in the range 2–50° 2 $\theta$  with a step scan of 0.02° and a scan rate of 0.10° min<sup>-1</sup>.

#### **Fourier-transform infrared spectroscopy (FT-IR)**

The FT-IR spectra were obtained in the range of 4000-500 cm<sup>-1</sup> on a Shimadzu IRTracer-100 spectrometer using KBr pellets.

#### **Thermal gravimetric analysis (TGA)**

The TGA was performed using a TA Instruments Q500HR analyzer, under an N<sub>2</sub> atmosphere using the high-resolution mode (dynamic rate TGA) at a scan rate of 2 °C/min, from room temperature to 640 °C.

#### **Nitrogen adsorption-desorption**

Nitrogen adsorption-desorption isotherms were measured by a volumetric method using a Micromeritics ASAP 2020 gas sorption analyzer. The sample mass was 65.0 mg. Free space correction measurements were performed using ultra-high purity He gas (UHP grade 5, 99.999% pure). Nitrogen isotherms were measured using UHP-grade Nitrogen. All nitrogen analyses were performed using a liquid nitrogen bath at 77 K. Oil-free vacuum pumps were used to prevent contamination of sample or feed gases.

## Catalysis experiments

Prior to the catalytic experiments, MFM-300(Sc) was acetone-exchanged for 3 days and dried at 120 °C under a vacuum. After that, MFM-300(Sc) was compacted and meshed to have a defined particle size (0.425-0.850 mm), using 1 TON m<sup>-2</sup> of pressure. The catalytic test for the ACE conversion by MFM-300(Sc) was carried out using a Micro activity Effi reactor system (Figure S1), with a continuous flow fixed bed microreactor (9 mm i.d.), which was loaded with 15 mg of the catalyst. Before the catalytic test, the sample was activated under an N<sub>2</sub> (25 mL min<sup>-1</sup>) atmosphere for 4 h at 150°C. For the reaction, a flow of 0.1 mL min<sup>-1</sup> of ACE was introduced using a micro syringe pump, and a gas flow of H<sub>2</sub> of 25 mL min<sup>-1</sup>. Both flows were introduced to an evaporator at 150 °C to ensure a homogenous gas-phase mix before entering the reactor. The flowing gas was regulated through a pre-calibrated mass flow controller with digital read-out units (MKS Instruments). The chemical reaction was carried out at atmospheric pressure and two temperatures were selected (80 and 180 °C) for 4h. The reaction products were recovered in a Peltier condenser cooled at 4 °C (Figure S2). The reactant and products concentrations were measured using a gas chromatograph (Clarus 480 chromatograph PerkinElmer) containing a Supelcowax fused silica capillary column (30 m × 0.25 mm, 0.25µm film thickness) connected to a flame ionization detector.

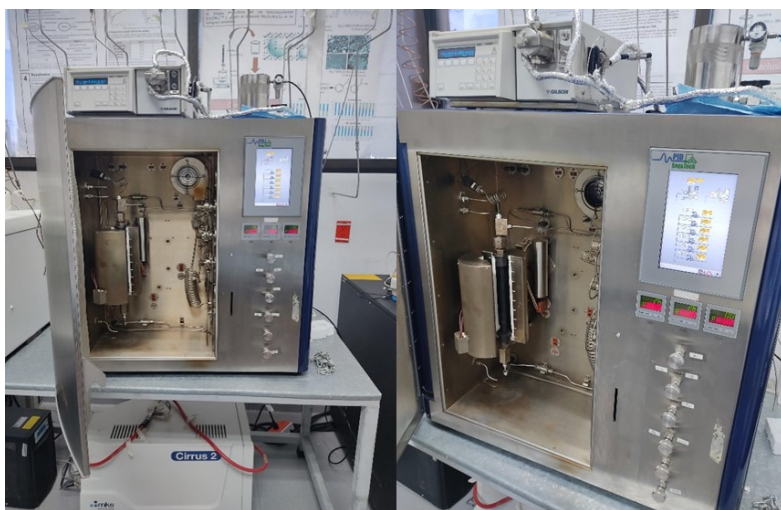

**Figure S1.** Microactivity Effi system.

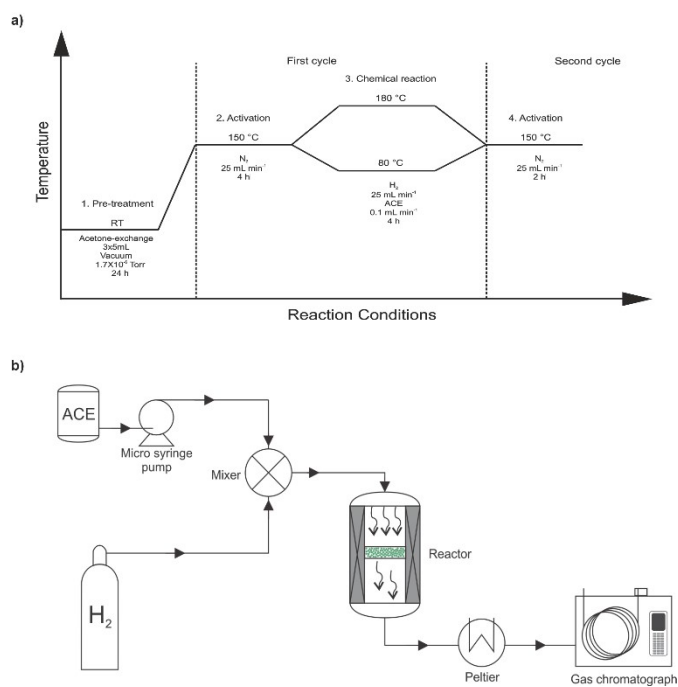

**Figure S2.** a) Diagram of the catalytic progress of the reaction and b) scheme of the reaction system.

## S2. Results and Discussions

### Synthesis of MFM-300(Sc)

#### PXRD

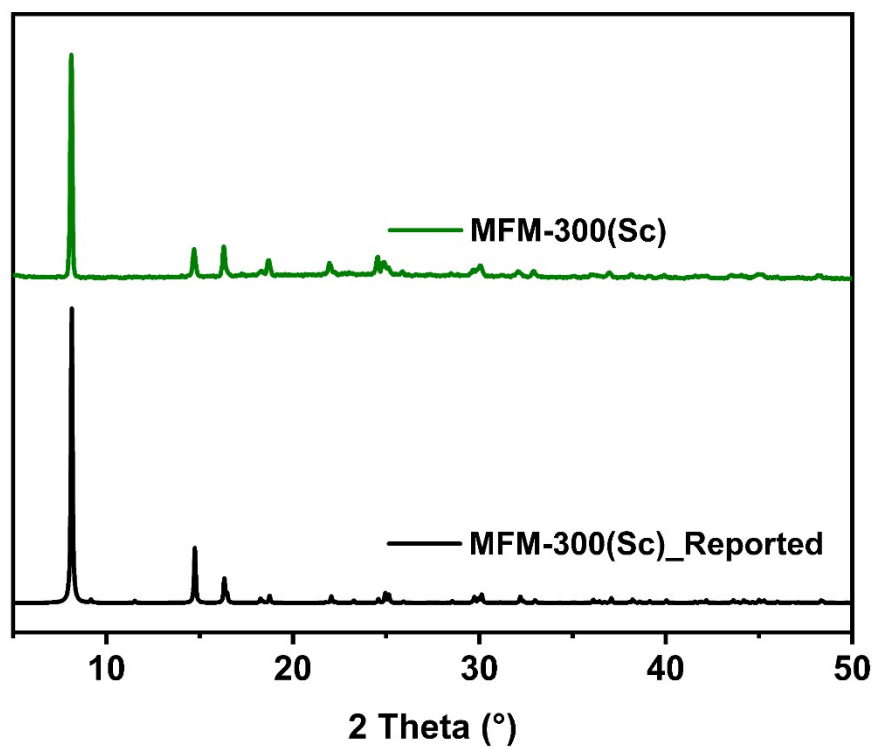

**Figure S3.** PXRD pattern of MFM-300(Sc) reported (black line), and MFM-300(Sc) as-synthesized (green line).

## FTIR

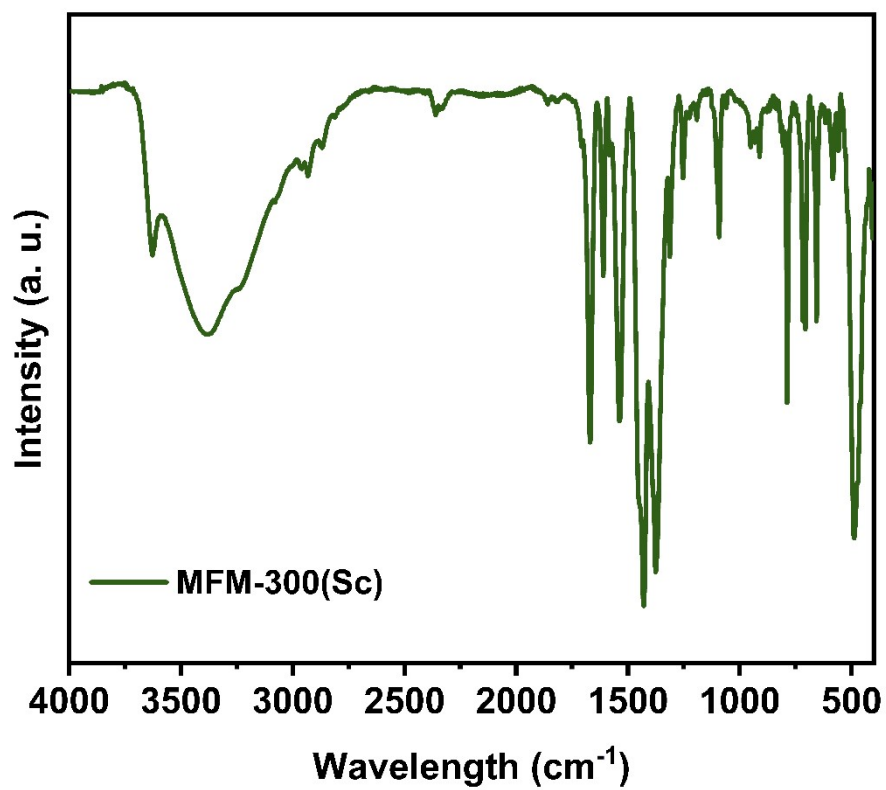

**Figure S4.** FTIR spectra of MFM-300(Sc) as-synthesized.

TGA

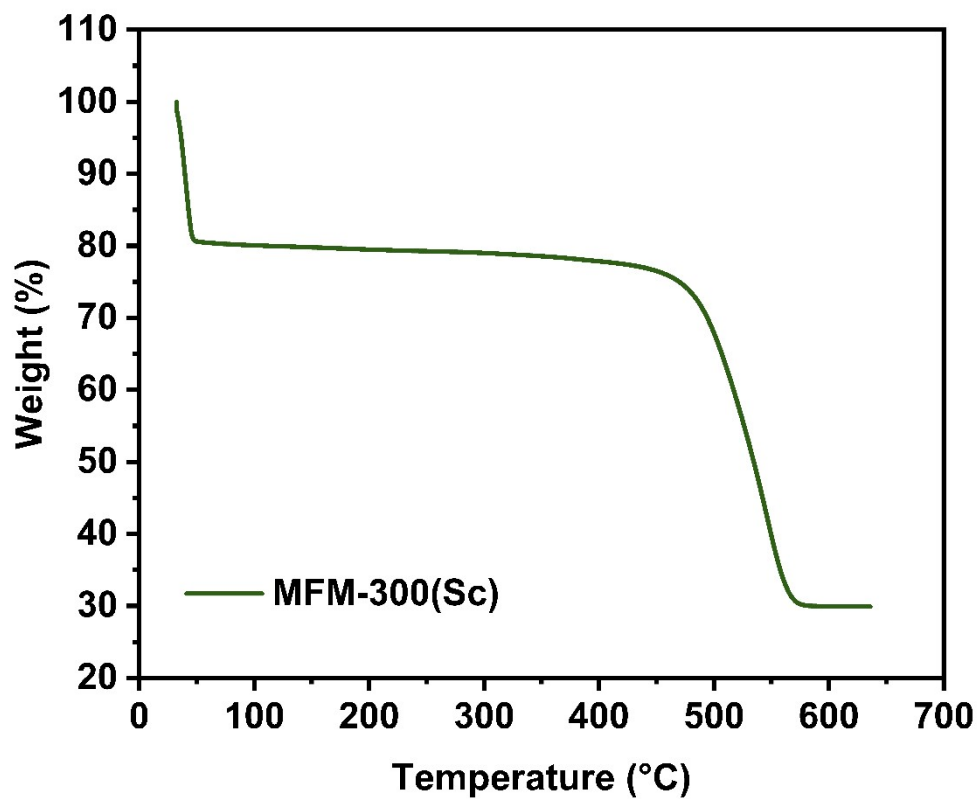

Figure S5. TGA spectra of MFM-300(Sc) as-synthesized.



## Nitrogen adsorption-desorption

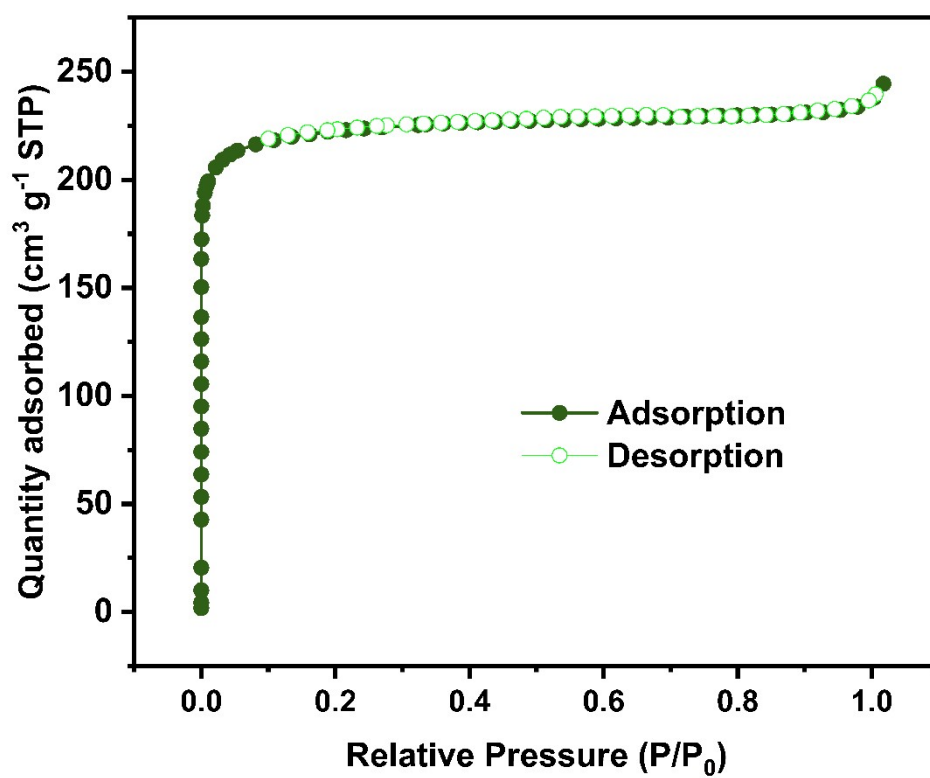

**Figure S6.** Nitrogen isotherm of MFM-300(Sc) as-synthesized: adsorption (dark green close line) and desorption (light green open line).

**Table S1.** Comparative table of the catalytic activity of different materials on the hydrogenation of acetone.

| Material                                             | T (°C) | P(atm) | Conversion (%) | Yield (%) | References       |
|------------------------------------------------------|--------|--------|----------------|-----------|------------------|
| 0.1%Pd/HT                                            | 118    | 27     | 38             | 32        | <sup>2</sup>     |
| TiO <sub>2</sub> -SiO <sub>2</sub> /SiO <sub>2</sub> | 200    | 2      | 65.5           | 41.6      | <sup>3</sup>     |
| Pd/S(PS-GO)                                          | 160    | 20     | 59.6           | 33.5      | <sup>4</sup>     |
| Ni/MgO-Al <sub>2</sub> O <sub>3</sub>                | 160    | 1      | 63.9           | 19.8      | <sup>5</sup>     |
| Pd@MIL-101(Cr)                                       | 180    | 7.4    | 73.5           | 48.1      | <sup>6</sup>     |
| Pd/UIO-66                                            | 120    | 1      | 25.3           | 23.8      | <sup>7</sup>     |
| MFM-300(Sc)                                          | 180    | 1      | 27.7           | 27.2      | <b>This work</b> |

**Table S2.** TON number and yield of the reaction.

| Experiment                                                                                                                                     | Temperature (°C) | Yield (%) | TON* |
|------------------------------------------------------------------------------------------------------------------------------------------------|------------------|-----------|------|
| Initial test                                                                                                                                   | 180              | 27.2      | 710  |
| Cycle (Spent catalyst reuse)                                                                                                                   | 180              | 26.9      | 706  |
| Reproducibility test                                                                                                                           | 180              | 26.1      | 683  |
| Low-temperature test                                                                                                                           | 80               | 13.4      | 353  |
| *TON was calculated based on the total metal of the material, which is considered an apparent number, due to the dynamics of the metal center. |                  |           |      |

PXRD after the defined particle size, and after catalysis

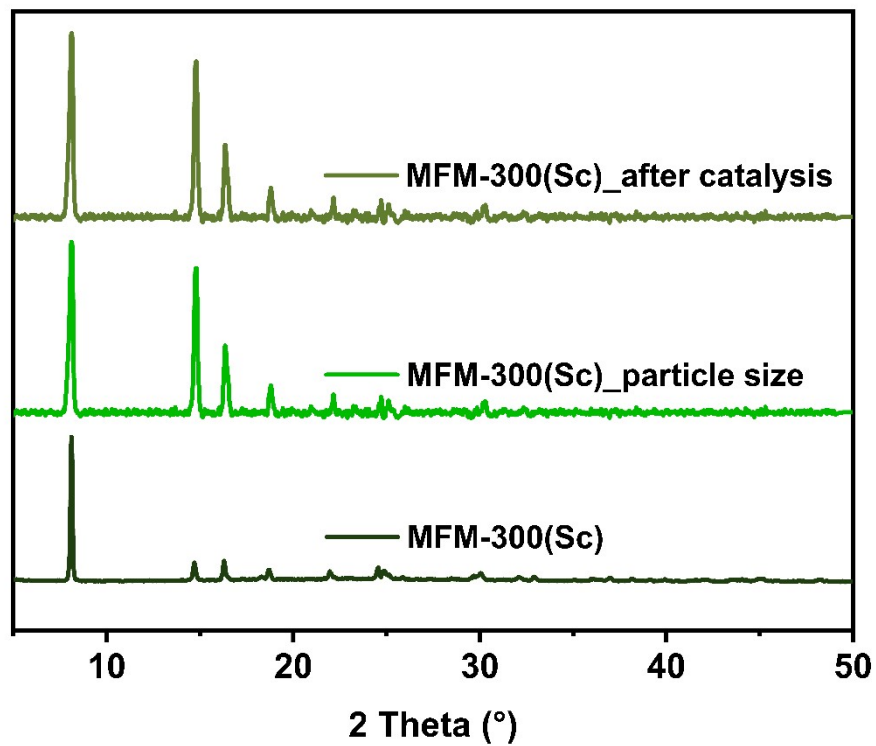

**Figure S7.** PXRD pattern of MFM-300(Sc) (dark green line), the particle size of MFM-300(Sc) (green line), and MFM-300(Sc) after catalysis (light green).

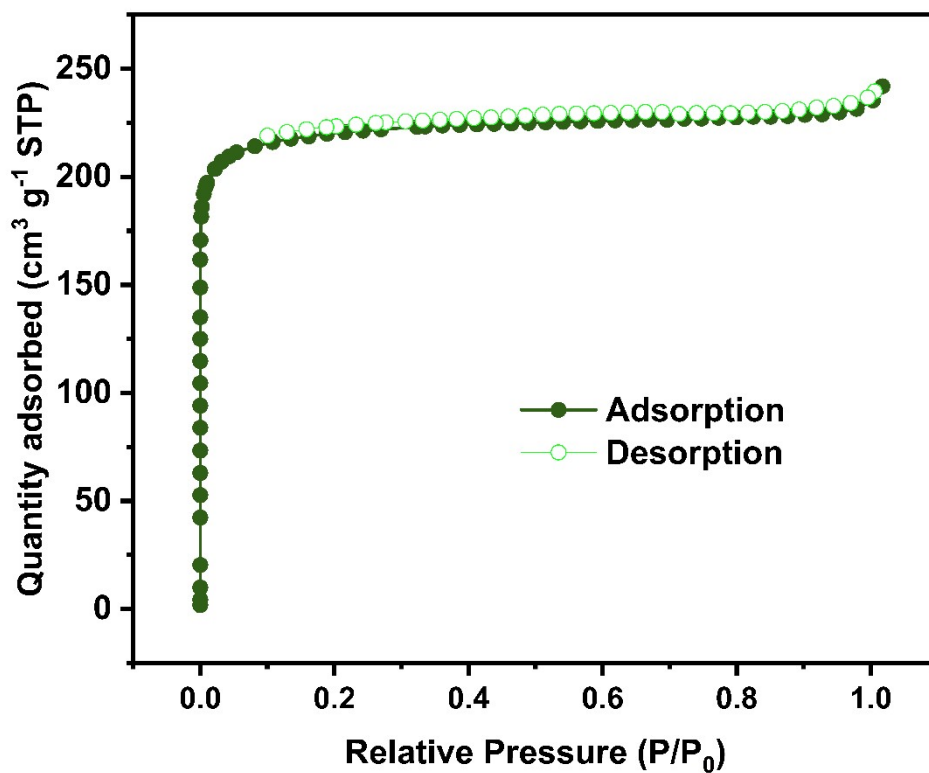

**Figure S8.** Nitrogen isotherm of MFM-300(Sc) post-catalysis with a BET surface area and pore volume of  $1340 \text{ m}^2 \text{ g}^{-1}$  and  $0.56 \text{ cm}^3 \text{ g}^{-1}$  respectively, in excellent agreement with the previously reported values ( $1390 \text{ m}^2 \text{ g}^{-1}$  and  $0.58 \text{ cm}^3 \text{ g}^{-1}$ , respectively).<sup>8</sup>

### S3. References

1. I. A. Ibarra, S. Yang, X. Lin, A. J. Blake, P. J. Rizkallah, H. Nowell, D. R. Allan, N. R. Champness, P. Hubberstey and M. Schröder, *Chem. Commun.*, 2011, **47**, 8304.
2. A. A. Nikolopoulos, B. W.-L. Jang and J. J. Spivey, *Appl Catal A Gen*, 2005, **296**, 128–136.
3. H. Duan, Z. Wang, L. Cui, B. Lin and Y. Zhou, *Ind Eng Chem Res*, 2018, **57**, 12358–12366.
4. Y. Zhu, B. Lin, Y. Hu, Z. Cai, H. Xie, K. Wang and Y. Zhou, *Molecular Catalysis*, 2019, **478**, 110609.
5. Y. Shen, J. Yi, Y. Yan, D. Liu, L. Fan and S. Li, *Journal of Chemical Engineering of Japan*, 2016, **49**, 656–662.
6. Y. Pan, B. Yuan, Y. Li and D. He, *Chemical Communications*, 2010, **46**, 2280.
7. Y. Hu, Y. Mei, B. Lin, X. Du, F. Xu, H. Xie, K. Wang and Y. Zhou, *RSC Adv*, 2021, **11**, 48–56.
8. M. Rivera-Almazo, E. Perez-Sanchez, E. Martínez-Ahumada, A. Martínez, J. Garza, I. A. Ibarra and R. Vargas, *J. Phys. Chem. C*, 2022, **126**, 6465–6471.
